# Supplementary material
Source: PubMed Central journal article supplement (PMC7501265)
Supplement: NIHMS1613158-supplement-2.pdf [file NIHMS1613158-supplement-2.pdf]

## Supplemental Figure 1

| CRS Grade                                                                         | Sign or Symptom                                                                   | Management                                                                                                                                                                                                                                                                                                                                                                                                                                                                                                                                                                                                                                                                                                                                                                                                                                                                                                                                                                                           |
|-----------------------------------------------------------------------------------|-----------------------------------------------------------------------------------|------------------------------------------------------------------------------------------------------------------------------------------------------------------------------------------------------------------------------------------------------------------------------------------------------------------------------------------------------------------------------------------------------------------------------------------------------------------------------------------------------------------------------------------------------------------------------------------------------------------------------------------------------------------------------------------------------------------------------------------------------------------------------------------------------------------------------------------------------------------------------------------------------------------------------------------------------------------------------------------------------|
| Grade 1                                                                           | Fever                                                                             | <ul style="list-style-type: none"> <li>• Symptomatic management of constitutional symptoms and organ toxicities</li> <li>• Acetaminophen and hypothermia blanket as needed for fever</li> <li>• Assess for infection, empiric broad spectrum antibiotics</li> <li>• IV fluids as needed</li> <li>• Consider tocilizumab for persistent fever lasting &gt;3 days in patients with significant comorbidities or if patient is deteriorating</li> </ul>                                                                                                                                                                                                                                                                                                                                                                                                                                                                                                                                                 |
| Grade 2<br><i>All Grade 2 Cardiac telemetry and pulse oximetry, consider ECHO</i> | Hypotension<br><i>Not requiring vasopressors</i>                                  | <ul style="list-style-type: none"> <li>• IV fluid bolus of NS 500-1000 mL</li> <li>• If patient requires multiple fluids boluses assess fluid balance and consider tocilizumab.</li> <li>• For hypotension refractory to fluid boluses: tocilizumab 8 mg/kg IV.               <ul style="list-style-type: none"> <li>◦ For <u>high risk patients</u> consider tocilizumab + dexamethasone 10 mg IV x one</li> </ul> </li> <li>• If no response, consider redosing tocilizumab 8 mg/kg IV (may be repeated every 8 h for up to 3 doses in a 24 h period)</li> <li>• If hypotension persists after fluids boluses and 1-2 doses of tocilizumab, or if patient is not improving or deteriorating:               <ul style="list-style-type: none"> <li>◦ Consider dexamethasone 10 mg IV every 6 hours.</li> <li>◦ Manage as grade 3 CRS (start vasopressors, transfer to ICU and obtain ECHO)</li> </ul> </li> <li>• Symptomatic management of constitutional symptoms and organ toxicities</li> </ul> |
|                                                                                   | Hypoxia<br><i>(Low-flow nasal cannula → O<sub>2</sub> delivered at ≤ 6 L/min)</i> | <ul style="list-style-type: none"> <li>• Supplemental oxygen as needed</li> <li>• Tocilizumab 8mg/kg IV               <ul style="list-style-type: none"> <li>◦ For <u>high risk patients</u> consider tocilizumab + dexamethasone 10 mg IV x one</li> </ul> </li> <li>• If hypoxia persists after above interventions; however oxygen requirement is stable, continue close monitoring.</li> <li>• Tocilizumab may be repeated every 8 h for up to 3 doses in a 24 h period</li> <li>• If oxygen requirement increases or patient deteriorates:               <ul style="list-style-type: none"> <li>◦ Consider dexamethasone 10 mg IV every 6 hours</li> <li>◦ Manage as Grade 3 CRS</li> </ul> </li> <li>• Symptomatic management of constitutional symptoms and organ toxicities</li> </ul>                                                                                                                                                                                                       |
| Grade 3                                                                           | Hypotension<br><i>Requiring one vasopressor +/- vasopressin</i>                   | <ul style="list-style-type: none"> <li>• IV fluid boluses as needed, vasopressors as needed</li> <li>• Transfer to ICU, obtain ECHO if not performed already</li> <li>• Tocilizumab if not administered previously</li> <li>• Start dexamethasone 10 mg IV every 6 hours if not started previously. Alternatively methylprednisolone 1 mg/kg IV every 12 hours may be used.</li> <li>• Symptomatic management of constitutional symptoms and organ toxicities</li> </ul>                                                                                                                                                                                                                                                                                                                                                                                                                                                                                                                             |
|                                                                                   | Hypoxia<br><i>(High-flow nasal cannula → O<sub>2</sub> delivered at ≥6 L/min)</i> | <ul style="list-style-type: none"> <li>• Supplemental oxygen as needed</li> <li>• Tocilizumab if not administered previously</li> <li>• Start dexamethasone 10 mg IV every 6 hours if not started previously. Alternatively methylprednisolone 1 mg/kg IV every 12 hours may be used.</li> <li>• Symptomatic management of constitutional symptoms and organ toxicities</li> </ul>                                                                                                                                                                                                                                                                                                                                                                                                                                                                                                                                                                                                                   |
| Grade 4                                                                           | Hypotension<br><i>Requiring multiple vasopressors</i>                             | <ul style="list-style-type: none"> <li>• Vasopressors, tocilizumab and ECHO as above</li> <li>• Consider changing corticosteroids to high dose methylprednisolone 1000mg/day IV.</li> <li>• Symptomatic management of constitutional symptoms and organ toxicities</li> </ul>                                                                                                                                                                                                                                                                                                                                                                                                                                                                                                                                                                                                                                                                                                                        |
|                                                                                   | Hypoxia<br><i>Requiring positive pressure</i>                                     | <ul style="list-style-type: none"> <li>• Supplemental oxygen requiring positive pressure ventilations: (CPAP, BiPAP, intubation and mechanical ventilation)</li> <li>• Tocilizumab</li> <li>• Consider changing corticosteroids to high dose methylprednisolone 1000 mg/day IV.</li> <li>• Symptomatic management of constitutional symptoms and organ toxicities</li> </ul>                                                                                                                                                                                                                                                                                                                                                                                                                                                                                                                                                                                                                         |
