# Supplementary material
Source: PubMed Central journal article supplement (PMC7501265)
Supplement: NIHMS1613158-supplement-8.pdf [file NIHMS1613158-supplement-8.pdf]

Supplemental Figure 7
