# Supplementary material
Source: PubMed Central journal article supplement (PMC7501265)

### Supplemental Figure 3

**A**

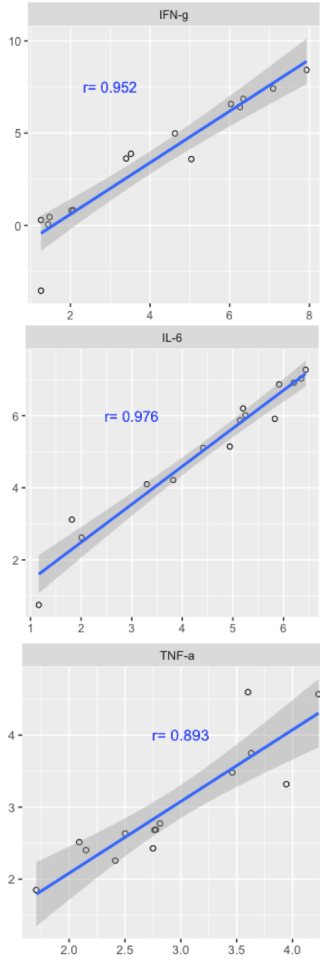

**B**

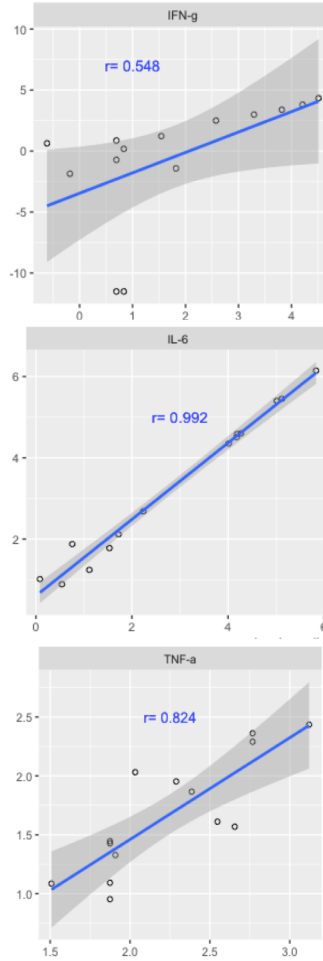

**C**

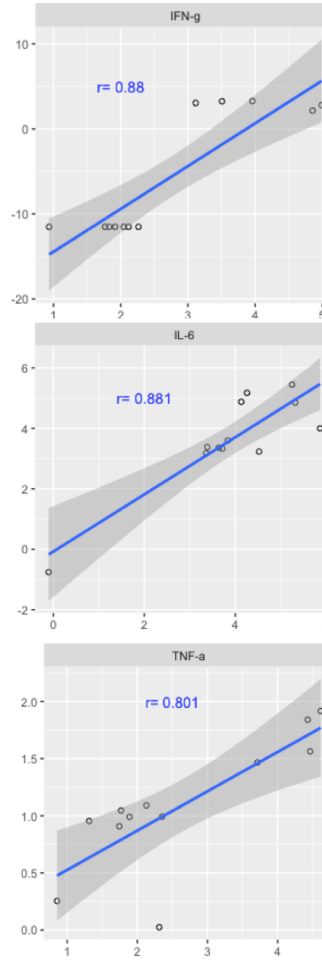

**D**

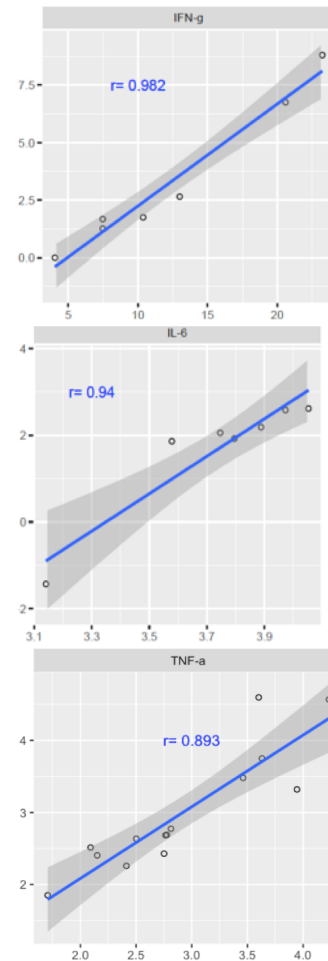

Supplement: NIHMS1613158-supplement-4.pdf [file NIHMS1613158-supplement-4.pdf]

Supplemental Figure 4

A

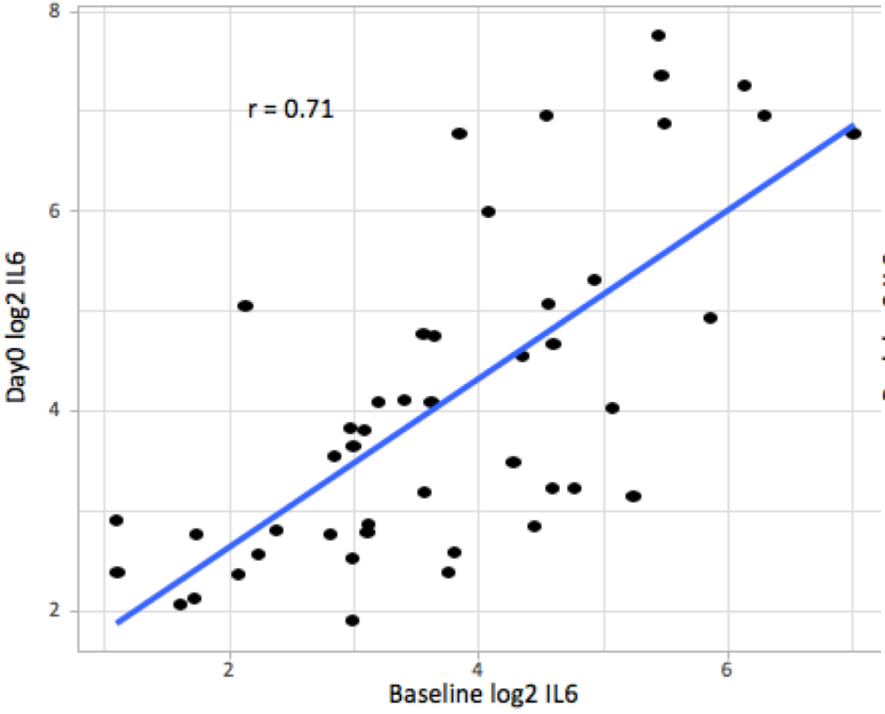

B

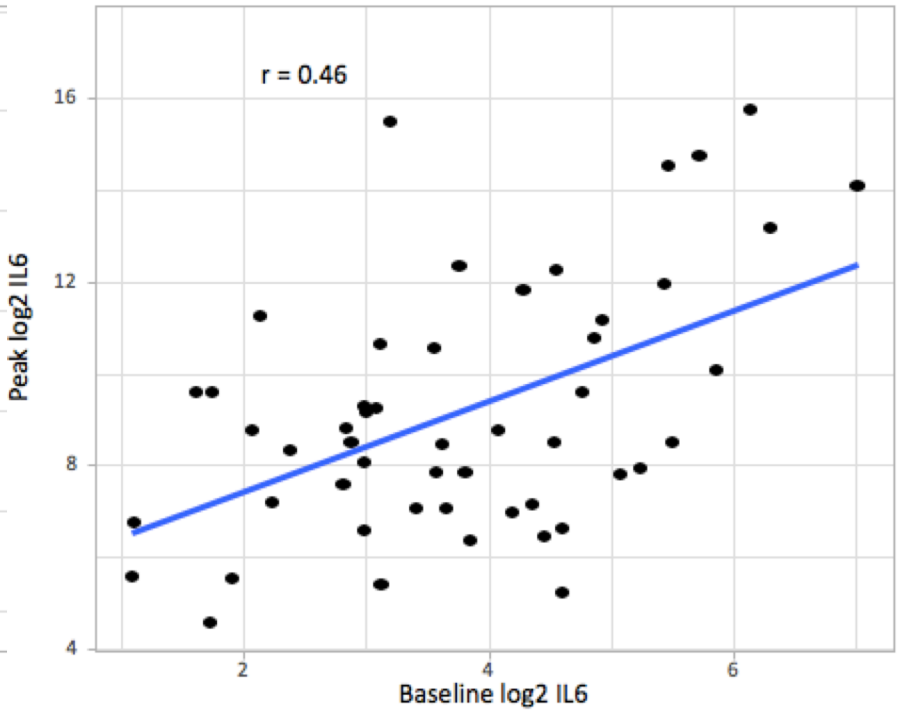

Supplement: NIHMS1613158-supplement-5.pdf [file NIHMS1613158-supplement-5.pdf]

Supplemental Figure 5

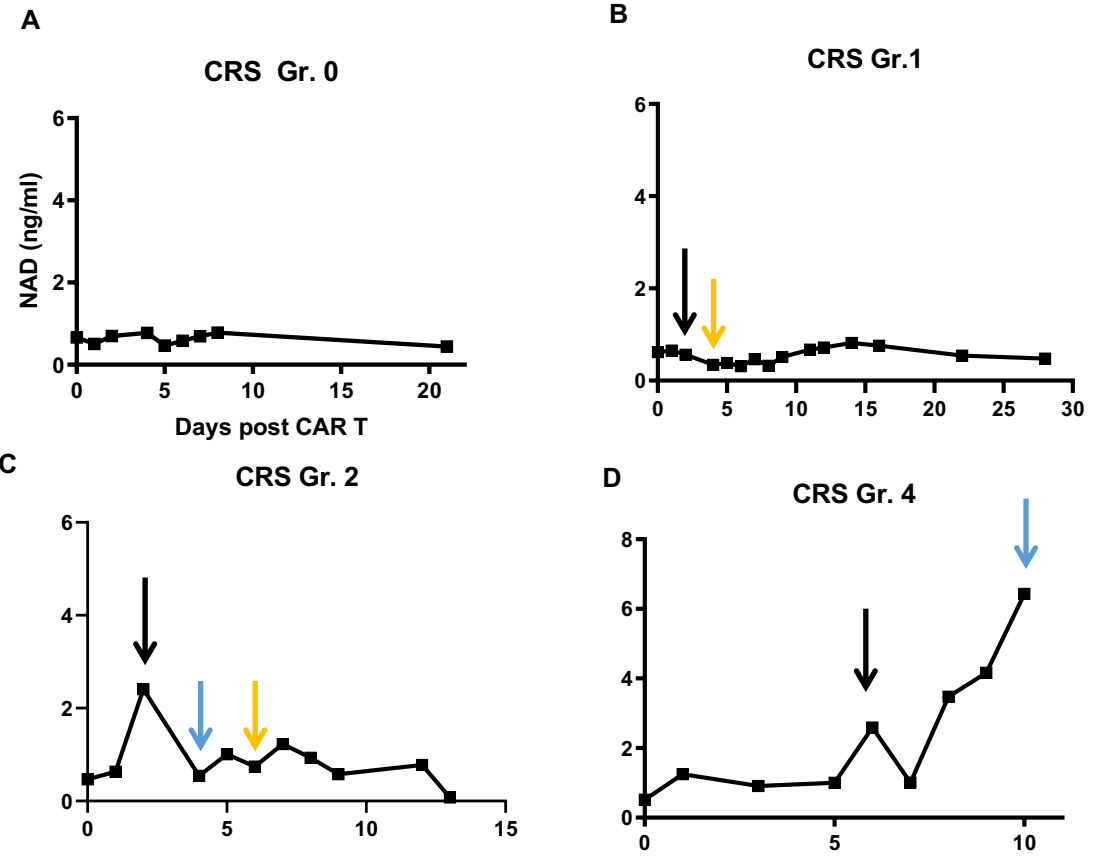

Supplement: NIHMS1613158-supplement-6.pdf [file NIHMS1613158-supplement-6.pdf]

# Supplemental Figure 6

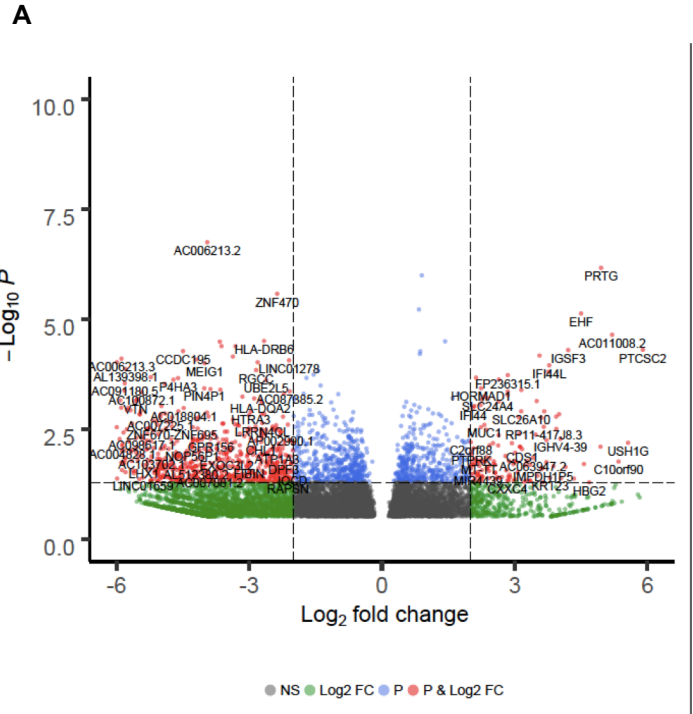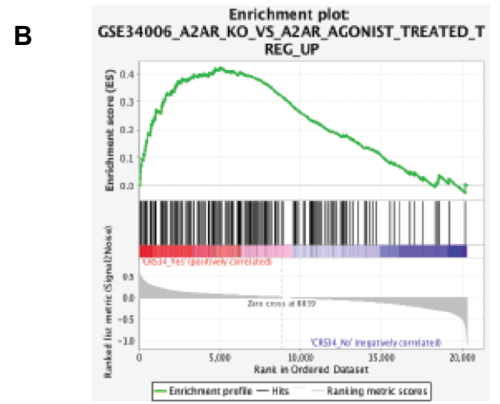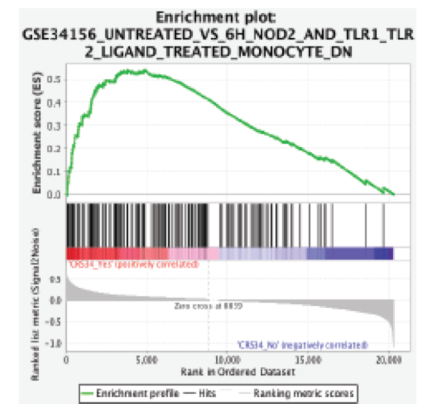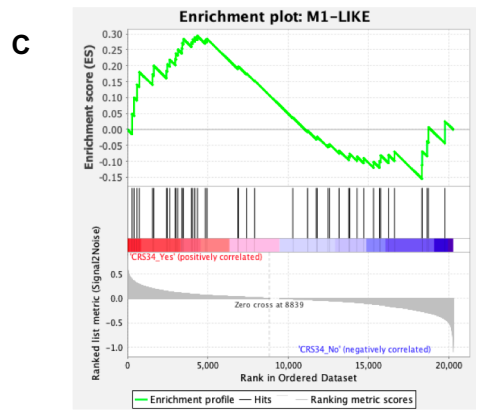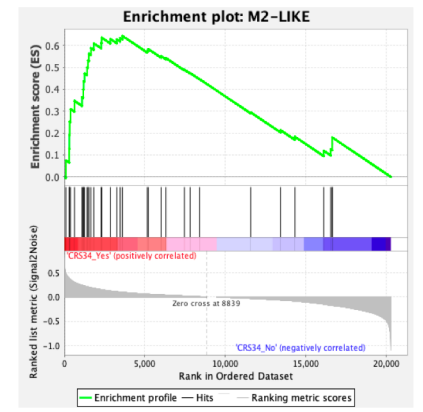

Supplement: NIHMS1613158-supplement-7.pdf [file NIHMS1613158-supplement-7.pdf]
